# Supplementary material
Source: PubMed Central journal article supplement (PMC10027624)
Supplement: NIHMS1838127-supplement-1838127_Sup_Info_File.pdf [file NIHMS1838127-supplement-1838127_Sup_Info_File.pdf]

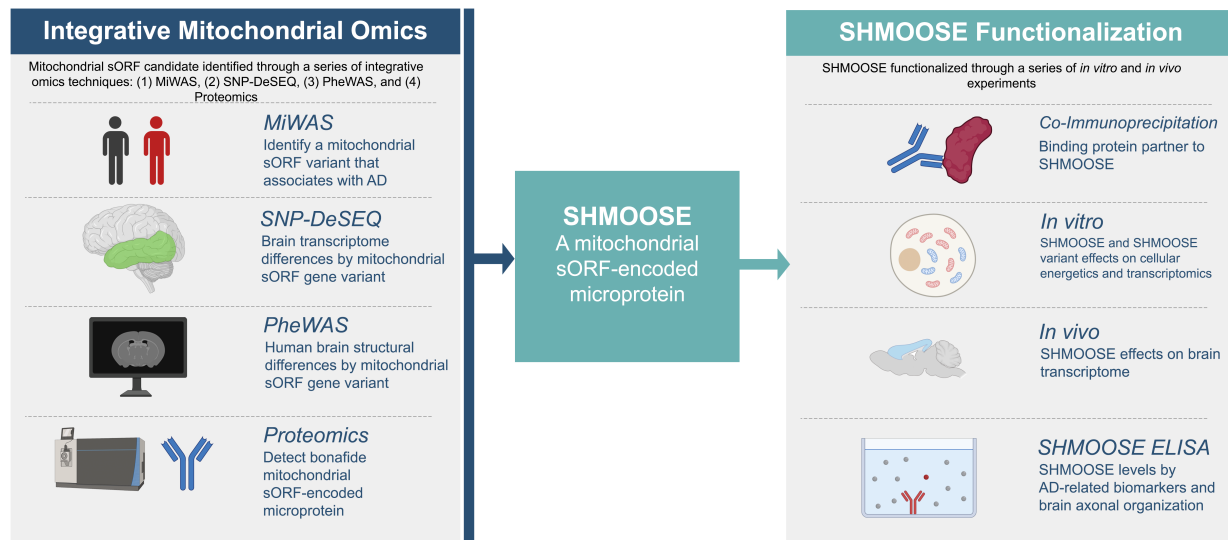

**Fig. S1. Implemented workflow starting with human omics data to microprotein functionalization**

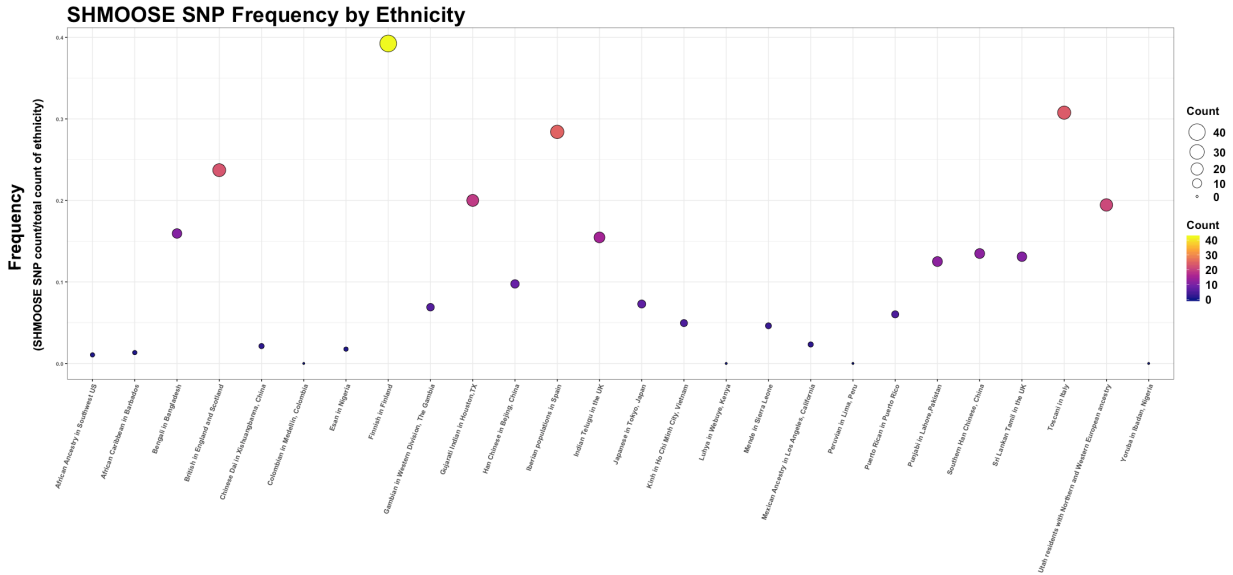

**Fig. S2. SHMOOSE mtSNP (at base pair position 12372) frequency in 1000 Genomes Project.**

On the x-axis are individuals sampled from respective locations. Count and size of the bubble per population indicates number of individuals with the SHMOOSE mtSNP. On the y-axis is frequency of the SNP within the population. For example, Finnish individuals from Finland have nearly a 40% frequency of the SHMOOSE mtSNP.

**A**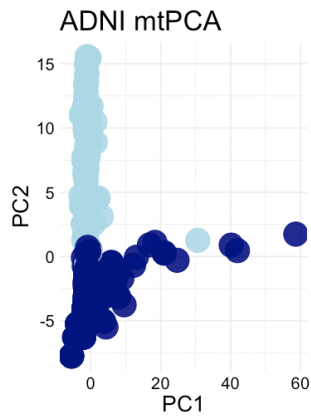**B**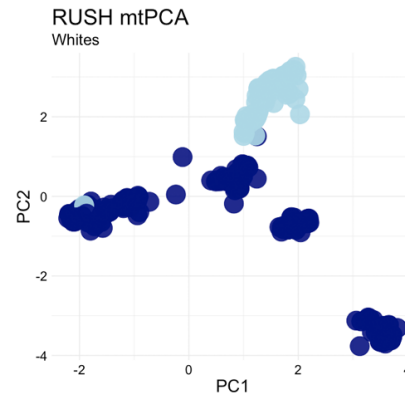**C**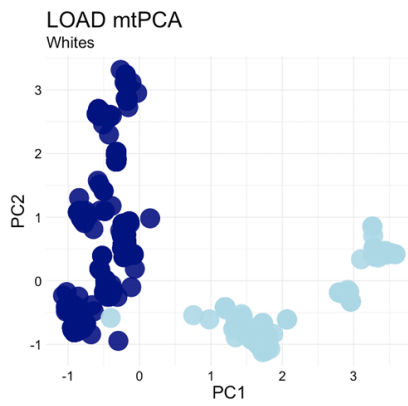**D**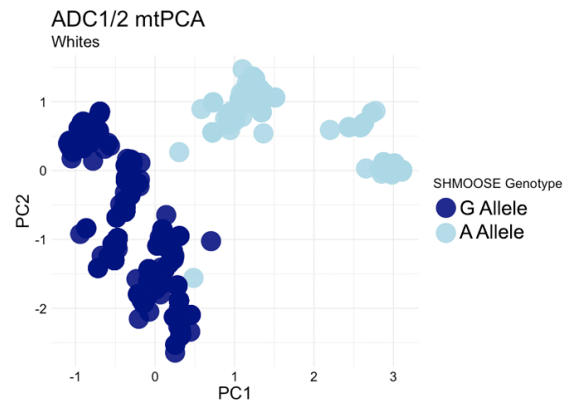

**Fig. S3. Mitochondrial-DNA principal component analyses per cohort.**

(A) mtPCA within the ADNI cohort. SHMOOSE A allele carriers cluster together. (B) RUSH ROSMAP mtPCA. SHMOOSE A allele carriers also appear to cluster together. (C) mtPCA within the LOAD cohort. SHMOOSE A allele carriers are within three distinct clusters. (D) mtPCA within the ADC1/2 cohort. SHMOOSE A allele carriers are within three distinct clusters.

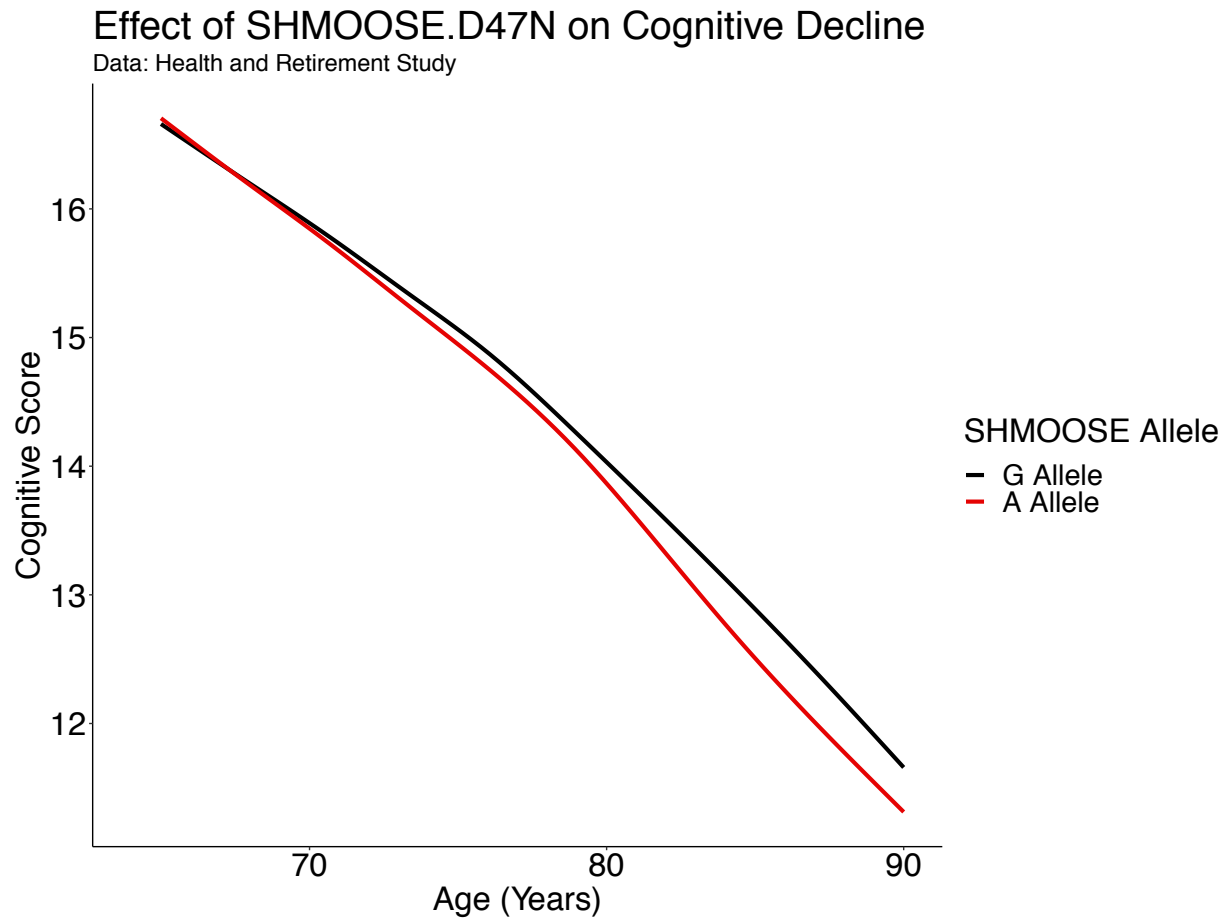

**Fig. S4. SHMOOSE mtSNP associates with faster cognitive decline.**

Individuals with the SHMOOSE mtSNP (A allele) were predicted to have accelerated cognitive decline. Model shows effects estimated from a mixed effects growth model. Red trajectories represent *SHMOOSE.D47N* carriers. Effects estimated starting at age 65 years old.

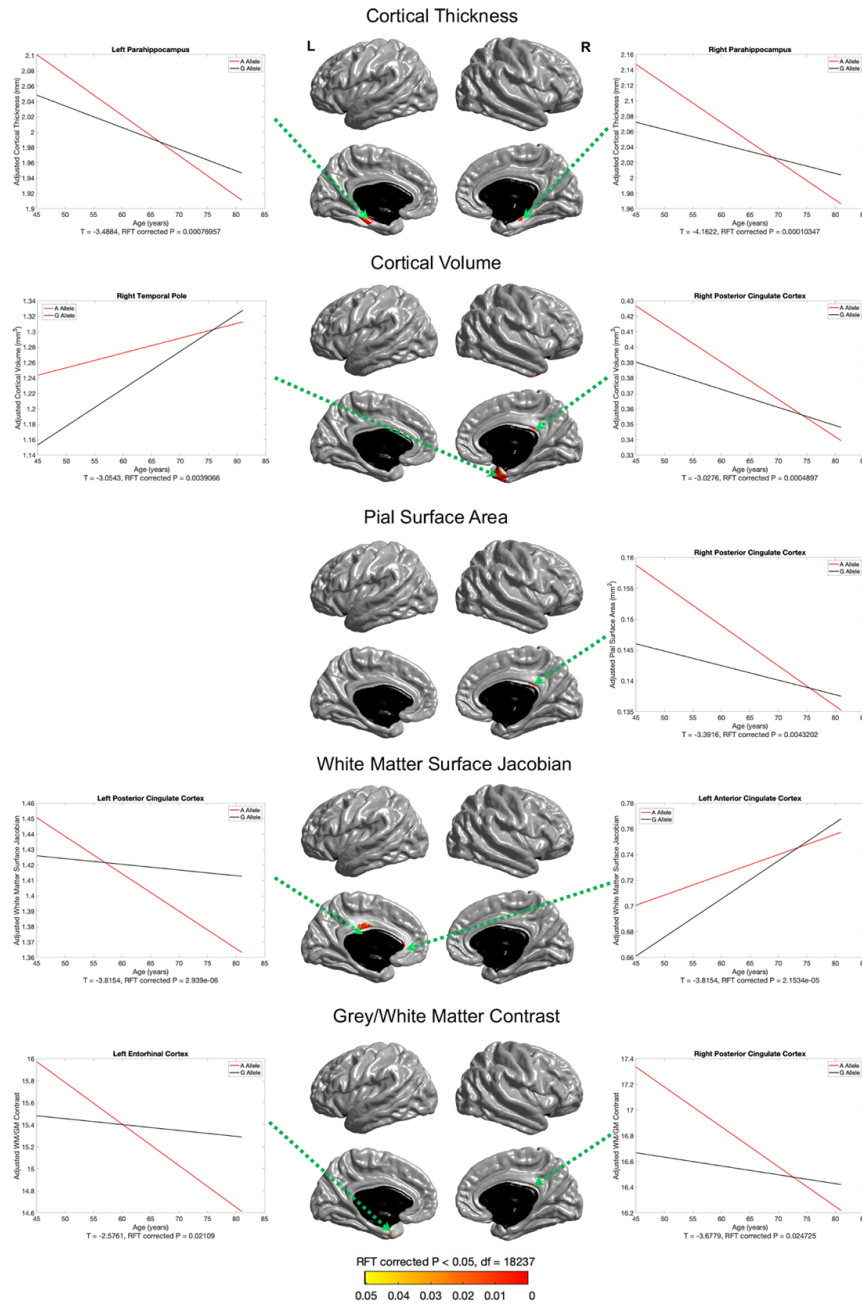

**Fig. S5. Neuroimaging-based PheWAS in UK Biobank that illustrates the significant effects of SHMOOSE.D47N and age on respective neuroimaging markers.** *SHMOOSE.D47* significantly associated with cortical thickness, volume, pial surface area, WM surface Jacobian, and GM/WM contrast in several paralimbic regions, including the parahippocampal gyri, the entorhinal cortex (EC), the anterior cingulate cortex (ACC), the posterior cingulate cortex (PCC), and the temporal pole (TPO) (clusterwise, RFT-corrected  $p$  value  $< 0.05$ . Color represents  $p$  value.

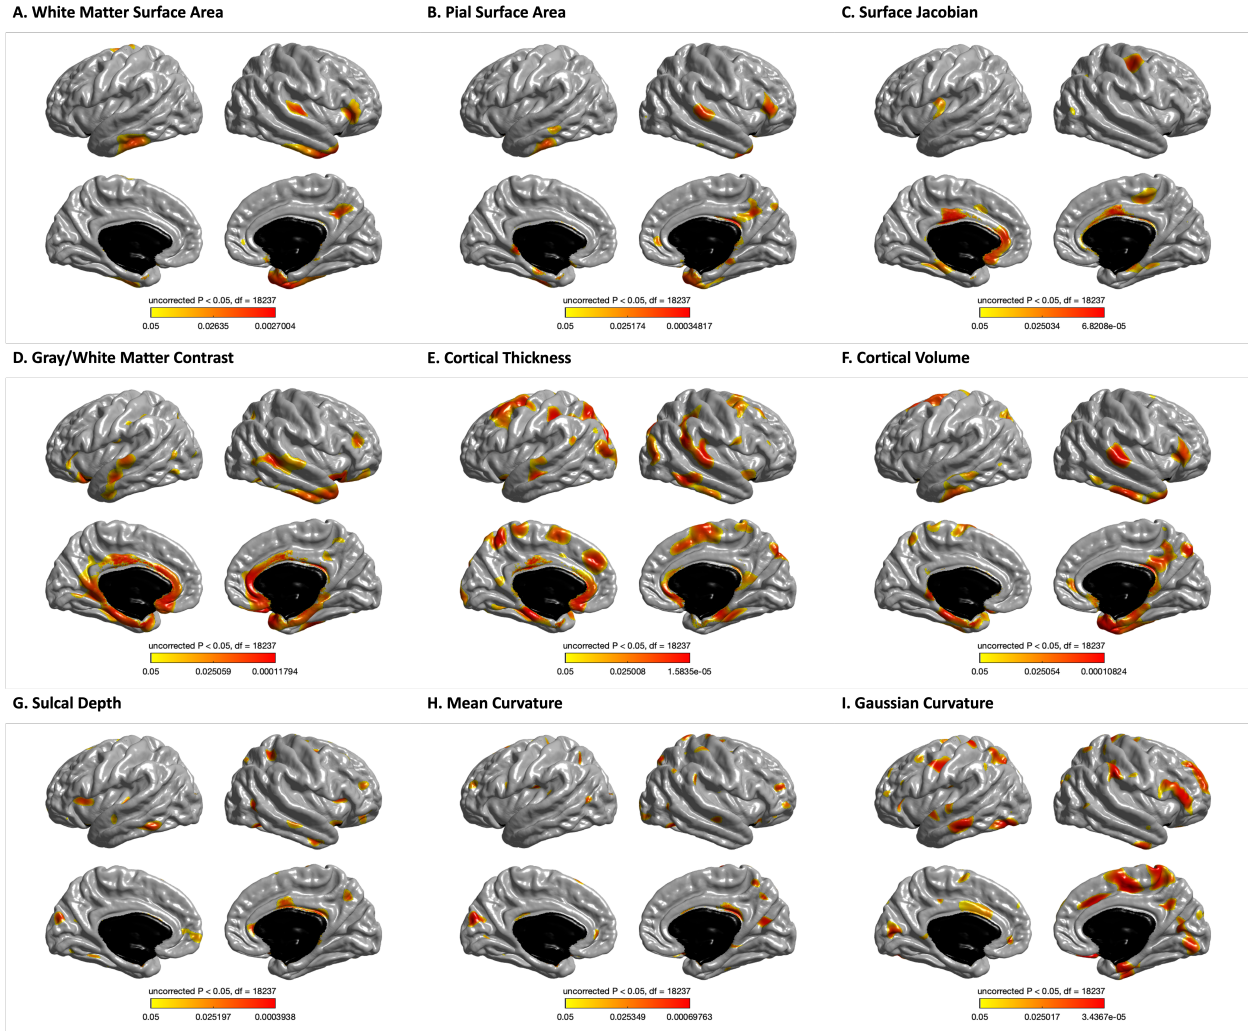

**Fig. S6. In UKB, the effects of *SHMOOSE.D47N* in the language centers (superior temporal and inferior frontal gyri), dorsolateral and medial prefrontal cortex, central motor, and occipital visual cortices. (A-I) In order, white matter surface area, pial surface area, surface jacobian, gray/white matter contrast, cortical thickness, cortical volume, sulcal depth, mean curvature, and gaussian curvature modeled. Color indicates  $p$  value. Effects are shown with lenient, uncorrected  $p$  value  $< 0.05$ .**

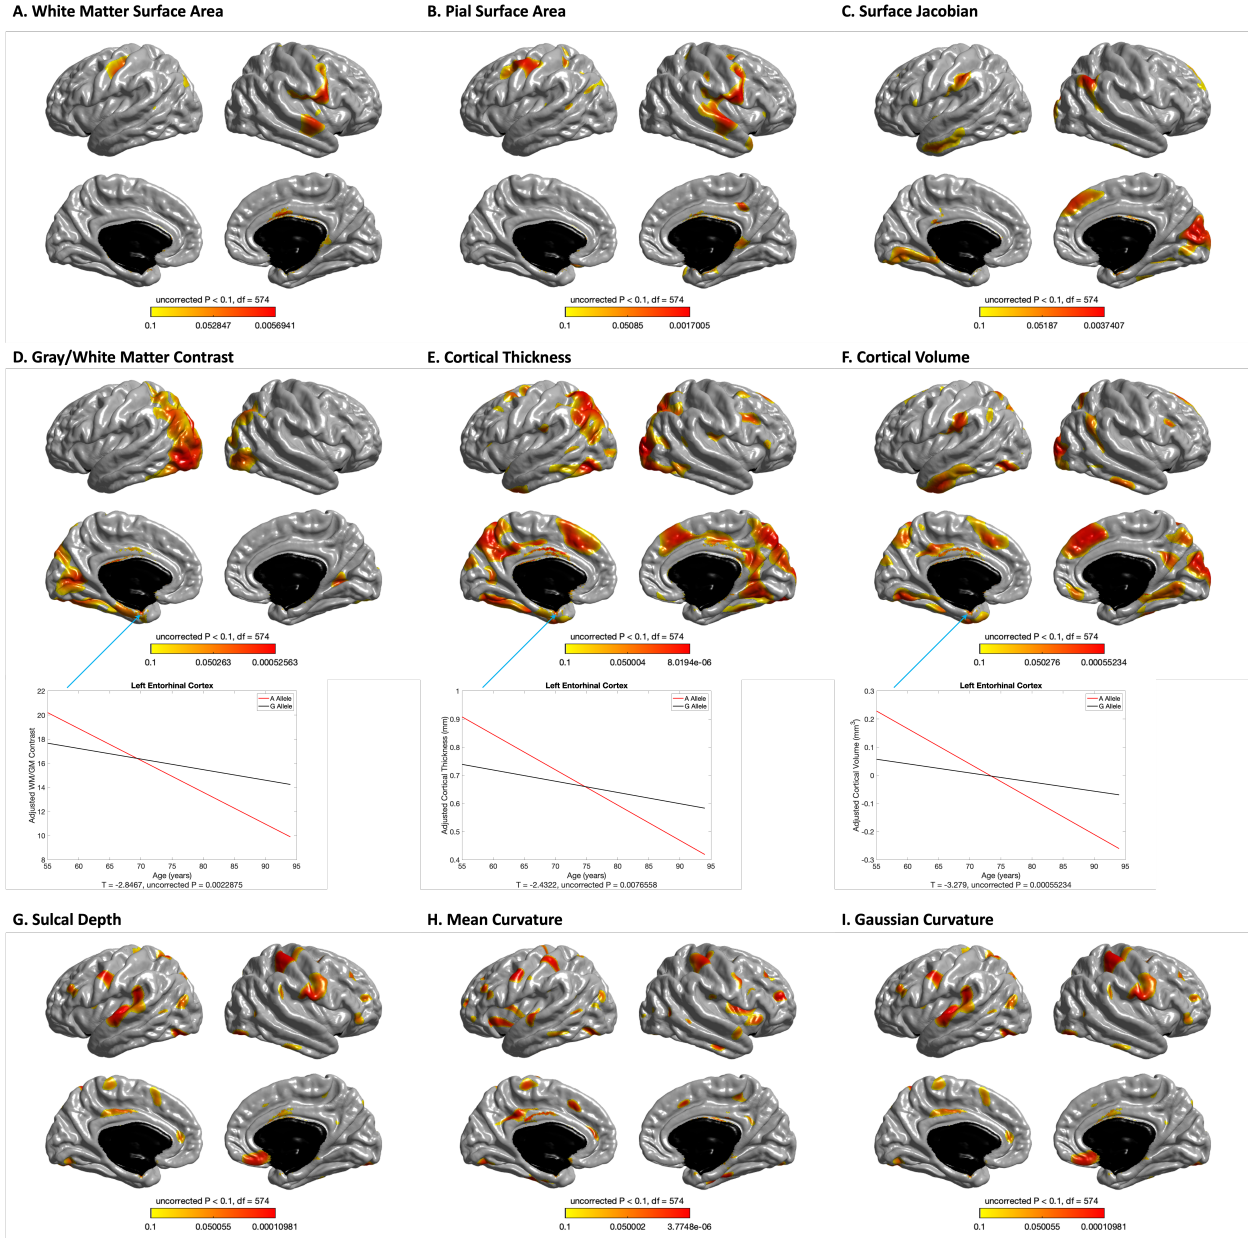

**Fig. S7. In ADNI, effects of *SHMOOSE.D47N* limbic regions such as the medial temporal cortex and posterior cingulate cortex at a lenient threshold of uncorrected  $p$  value  $< 0.05$ . (A-I). In order, white matter surface area, pial surface area, surface jacobian, gray/white matter contrast, cortical thickness, cortical volume, sulcal depth, mean curvature, and gaussian curvature modeled. Color indicates  $p$  value. Effects are shown with lenient, uncorrected  $p$  value**

< 0.05. In (D-F), interactions between SHMOOSE mtSNP and age are shown.

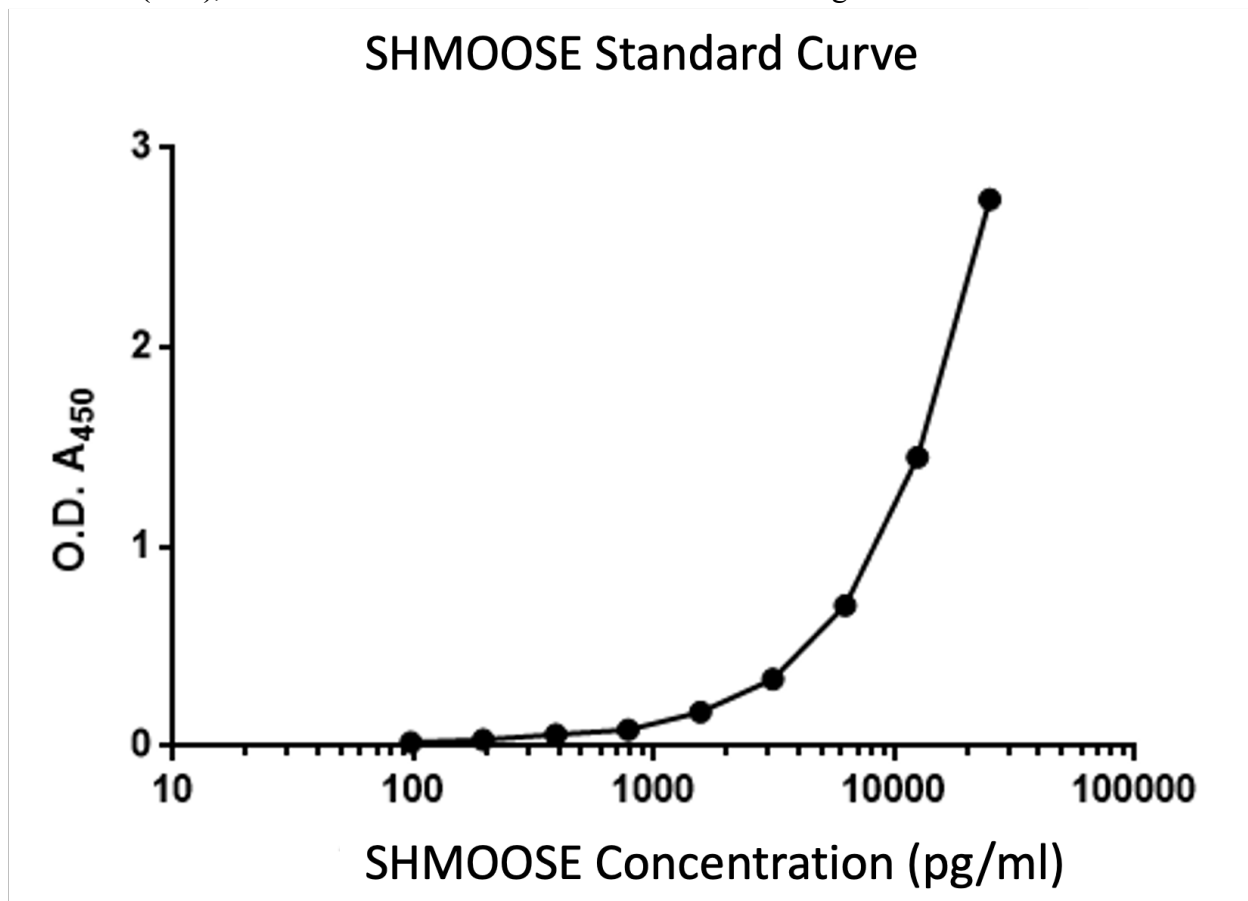

**Fig. S8. Standard Curve of SHMOOSE ELISA.**

The range of the standard curve is 100-250,000 pg/ml.

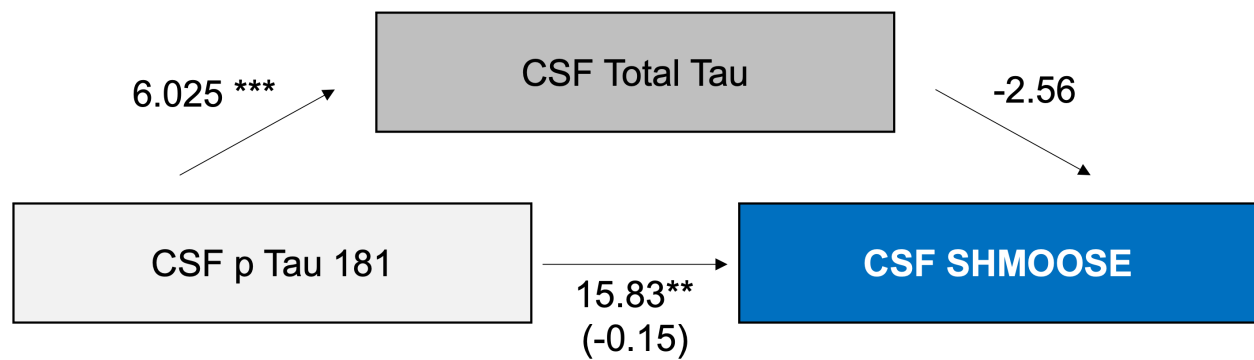

**Fig. S9. Effects of p Tau 181 on SHMOOSE with tau as a mediator.**

The indirect effect (ACME) is not significant (-0.15) below the combined indirect and direct (ADE) (15.83;  $p$  value < 0.01). The effect of p tau 181 on total was significant (6.025;  $p$  value < 0.01), while the effect of total tau on SHMOOSE when controlling for p tau 181 was not significant (-2.56).

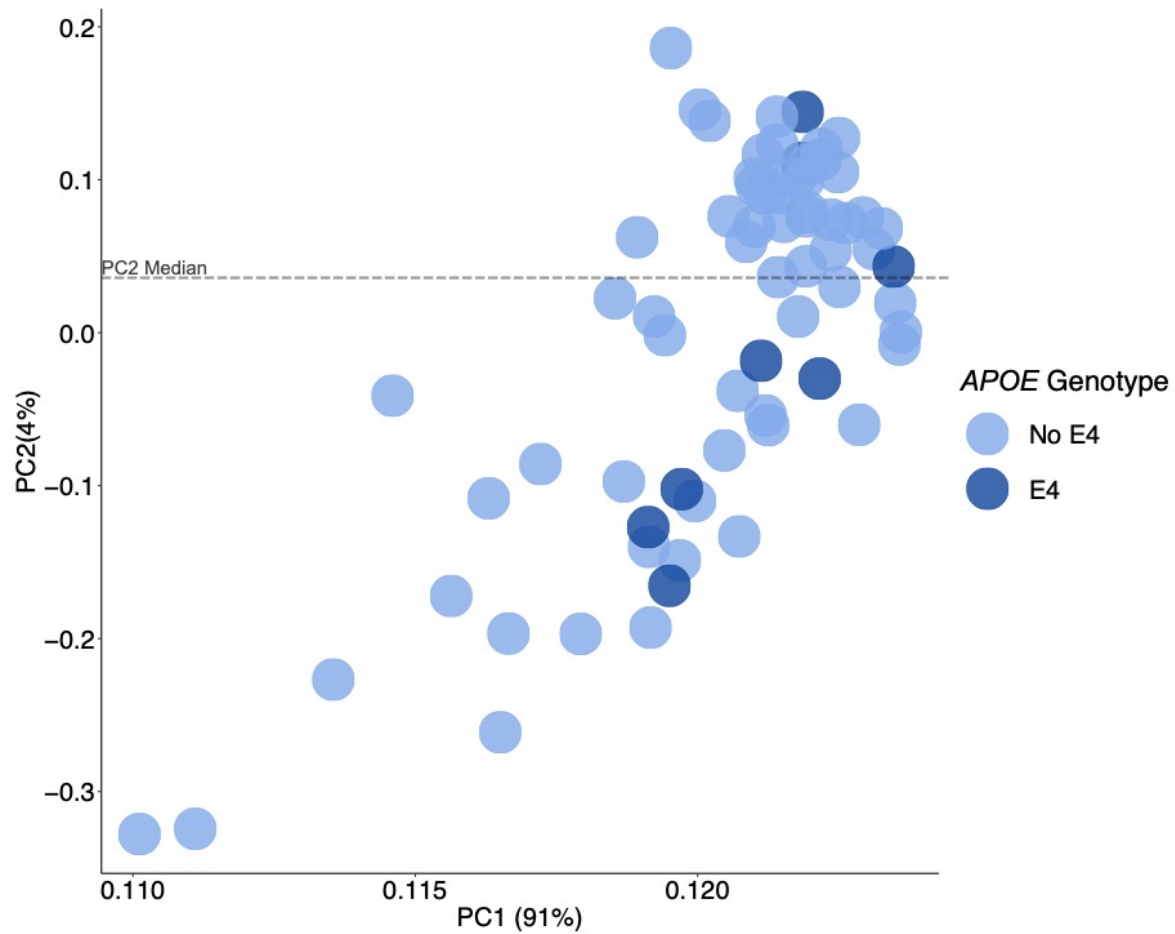

**Fig. S10. Principal component analysis (PCA) color coded to represent the 8 *APOE4* carriers.** Dashed line represents the median value of PC2. While not statistically significant, 5 of the 8 *APOE4* carriers fall below the PC2 median.
